# Supplementary material for: PtAg18 superatoms costabilized by phosphines and halides: synthesis, structure, and catalysis
Source: Royal Society of Chemistry journal article supplement (doi:10.1039/d3nr02196c), 2023-01-01
Supplement: d3nr02196c1.pdf [file d3nr02196c1.pdf]

Supplementary information for

**PtAg<sub>18</sub> Superatoms Co-stabilized by Phosphines and Halides:  
Synthesis, Structure and Catalysis**

Meng Wang,<sup>1,2,+</sup> Lin Wang,<sup>1,+</sup> Haoyuan Wu,<sup>1</sup> Jing Sun,<sup>1</sup> Xiaoxuan Xu,<sup>1</sup> Shuo Guo,<sup>2</sup>  
Yanyuan Jia,<sup>2,3,\*</sup> Simin Li,<sup>1,\*</sup> Zong-Jie Guan,<sup>4,\*</sup> and Hui Shen<sup>1,\*</sup>

<sup>1</sup>College of Energy Materials and Chemistry, Inner Mongolia University, Hohhot  
010021, China.

<sup>2</sup>College of Chemistry and Chemical Engineering, Inner Mongolia University, Hohhot  
010021, China

<sup>3</sup>Key Laboratory of Advanced Energy Materials Chemistry (Ministry of Education),  
Nankai University, Tianjin, 300071, China

<sup>4</sup>College of Chemistry and Chemical Engineering, Hunan University, Changsha  
410082, China.

+These authors contribute equally to this work.

\*E-mail: shen@imu.edu.cn; lism8687@163.com;  
jiayanyuan@imu.edu.cn; zjguan@hnu.edu.cn

## EXPERIMENTAL SECTION

**Reagents:** 1,3-bis(diphenylphosphino)propane (dppp, 99%) was purchased from J&K Scientific Ltd. (Beijing, China). Sodium hexafluoroantimonate ( $\text{NaSbF}_6$ , 98%) was purchased from Adamas. (Shanghai, China). Silver nitrate ( $\text{AgNO}_3$ , 98%), chloroplatinic acid hexahydrate ( $\text{H}_2\text{PtCl}_6 \cdot 6\text{H}_2\text{O}$ , 99.9%), dichloromethane ( $\text{CH}_2\text{Cl}_2$ , A.R.), methanol ( $\text{CH}_3\text{OH}$ , A.R.) were purchased from Sinopharm Chemical Reagent Co. Ltd. (Shanghai, China). Water used in all experiments was ultrapure. All other reagents were used as received without further purification.

**Synthesis of  $[\text{PtAg}_{18}(\text{dppp})_6\text{Cl}_8](\text{SbF}_6)_2$ :**  $\text{AgNO}_3$  (2 mg, 0.012 mmol), dppp (8 mg, 0.019 mmol), and  $\text{H}_2\text{PtCl}_6$  (1 mg, 0.0019 mmol) were dissolved in mixed solvents of  $\text{CH}_2\text{Cl}_2$  and MeOH. The reducing agent, 1.1 mg  $\text{NaBH}_4$  in 0.3 mL ethanol, was then added dropwise. After that,  $\text{NaSbF}_6$  (5 mg, 0.019 mmol) was added, followed by stirring for 10 min. The reaction was aged for 1 h in the absence of light to obtain raw product. After that, the solution was subjected to diffusion of ether and hexane. Orange block crystals were obtained after two weeks (1.03 mg, 28.98 % yield based on Ag).

### Characterizations

UV/Vis spectra were collected by JascoV-650 Spectrophotometer using a quartz cuvette of 1 mm path length. The scanning speed is  $1000 \text{ nm min}^{-1}$ . The spectra were recorded in diluted solutions of dichloromethane and the signal of the blank solvent was subtracted. The spectra were recorded in diluted solutions of dichloromethane and the signal of the blank solvent was subtracted.

Positive-ion electrospray ionization mass spectra (ESI-MS) were recorded using an Agilent 6224 time-of-flight mass spectrometer. The samples dissolved in dichloromethane were directly infused at a flow rate of 1.2 mL/h by a syringe pump. Typical parameters used for the measurements were as follows: capillary voltage: 4.0 kV; drying gas temp:  $150^\circ\text{C}$ ; drying gas flow: 4 L/min; nebulizer pressure: 20 psi.

$^1\text{H}$  and  $^{31}\text{P}$  NMR spectra were recorded at room temperature on a Bruker AV-600 spectrometer with TMS and solvent residual signal as an internal reference. All NMR data were processed on MestReNova software.

X-ray photoelectron spectroscopy (XPS) data was collected on ESCALABXI+. The spectra were calibrated using the C 1s peak (284.6 eV).

The infrared spectrum was recorded on Nicolet iS50 FT-IR spectrometer.

X-ray single-crystal analysis: The diffraction data of the single crystals of cluster  $\text{PtAg}_{18}$  was collected on a Rigaku Oxford Diffraction System X-ray single-crystal diffractometer using Cu  $K\alpha$  ( $\lambda = 1.54184 \text{ \AA}$ ) at 293 K. The data was processed using CrysAlis<sup>Pro</sup>.<sup>1</sup> The structure was solved and refined using Full-matrix least-squares

based on F2 using ShelXT,<sup>2</sup> ShelXL<sup>3</sup> in Olex2,<sup>4</sup> and Shelxle.<sup>5</sup> The thermal ellipsoids of the ORTEP diagram were done at 50% probability. Detailed crystal data and structure refinements for the compound is given in Table S1. CCDC 2077400 contains the supplementary crystallographic data for this paper. These data are provided free of charge by The Cambridge Crystallographic Data Centre.

## Catalytic experiment

### Preparation of PtAg<sub>18</sub>/XC-72 catalysts

In the typical preparation, 1.9 mg of [PtAg<sub>18</sub>(dppp)<sub>6</sub>Cl<sub>18</sub>](SbF<sub>6</sub>)<sub>2</sub> was dissolved in 10 mL of dichloromethane. Then 190.0 mg of XC-72 in ethanol was mixed and the mixture was stirred at room temperature for three hours. The mixture was then centrifuged, and the obtained solids were separated out. The supported catalysts were then dried to give the final catalysts.

### Catalytic experiments

For the catalytic test, a vial with the volume of 20 mL was used as the reactor. The catalytic reaction was carried out in air at room temperature. Typically, 0.05 mg of 4-nitrophenol dissolved in 0.5 mL of H<sub>2</sub>O was added into the vial, followed by freshly prepared NaBH<sub>4</sub> aqueous solution (1.0 mg per 2 mL). To the solution, 25.0 mg of catalysts (PtAg<sub>18</sub>/XC-72 catalysts) were added once and kept stirring. UV-Vis absorption spectroscopy was employed to monitor the total catalytic process. The conversion from 4-nitrophenol to 4-aminophenol was calculated from the absorbance intensity using the following equation:

$$\text{Conversion} = \frac{A(\text{initial}) - A(\text{final})}{A(\text{initial})} \times 100\%$$

### Computational details

The adsorption energy was evaluated based on DFT calculations by performing with the quantum chemistry program Gaussian 9. Structural optimization at the b3lyp/genecp (6-31G(d) for C, H, Cl, N, O, P, and lanl2dz for Pt and Ag) level were first performed, and the final electronic energy at the pbe/tzvp level was calculated based on optimized structure. The adsorption energy is defined as the difference in energy between the adsorbed system and the combined energies of the bare cluster and isolated adsorbate molecule. A negative value indicates a favorable interaction.

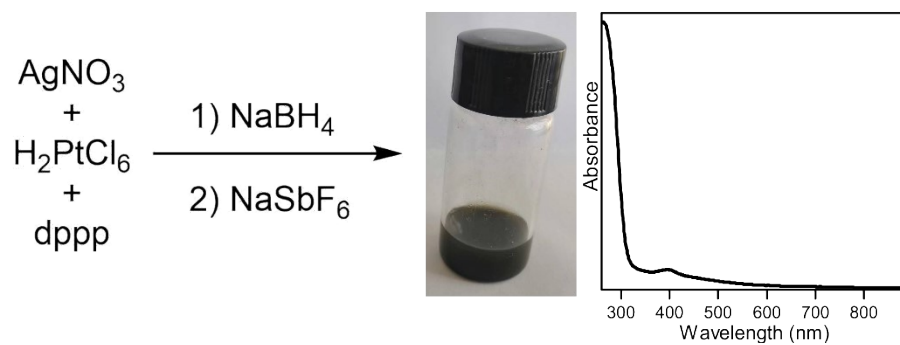

**Figure S1.** Synthetic prototype and characterization of raw product of PtAg<sub>18</sub> clusters.

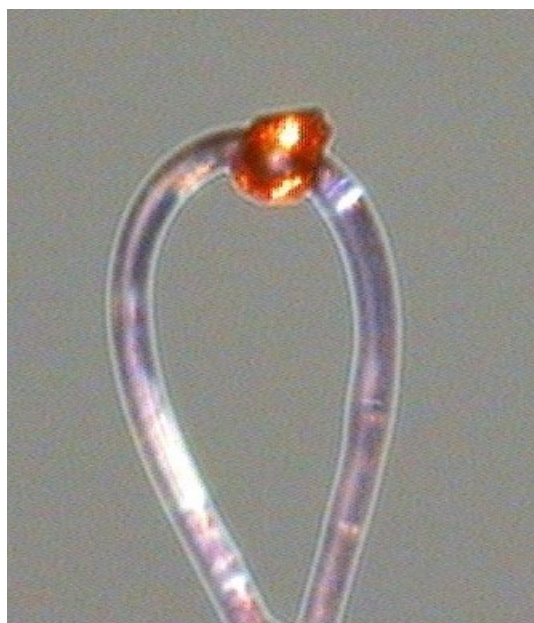

**Figure S2.** Photographs of single crystals of PtAg<sub>18</sub> clusters.

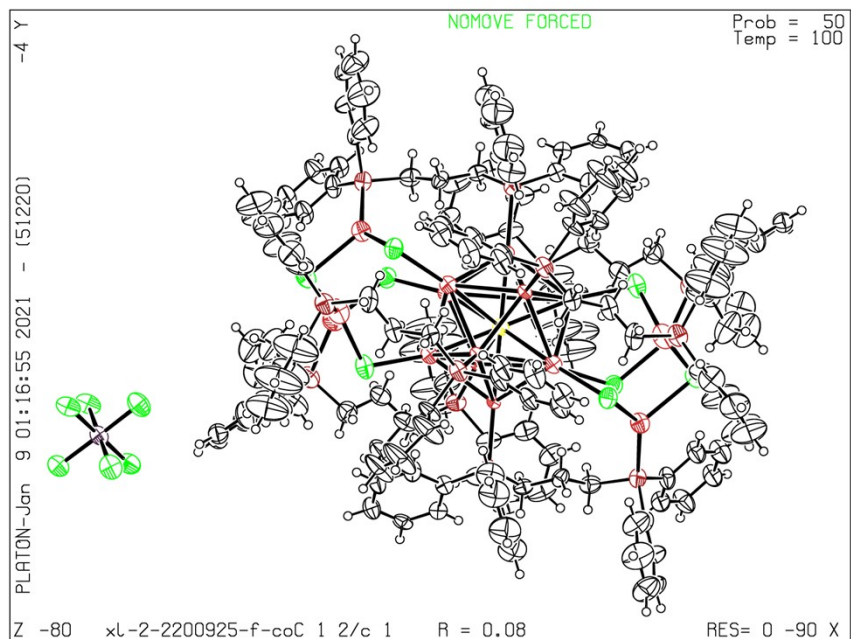

**Figure S3.** The thermal ellipsoids of the ORTEP diagram of PtAg<sub>18</sub> clusters.

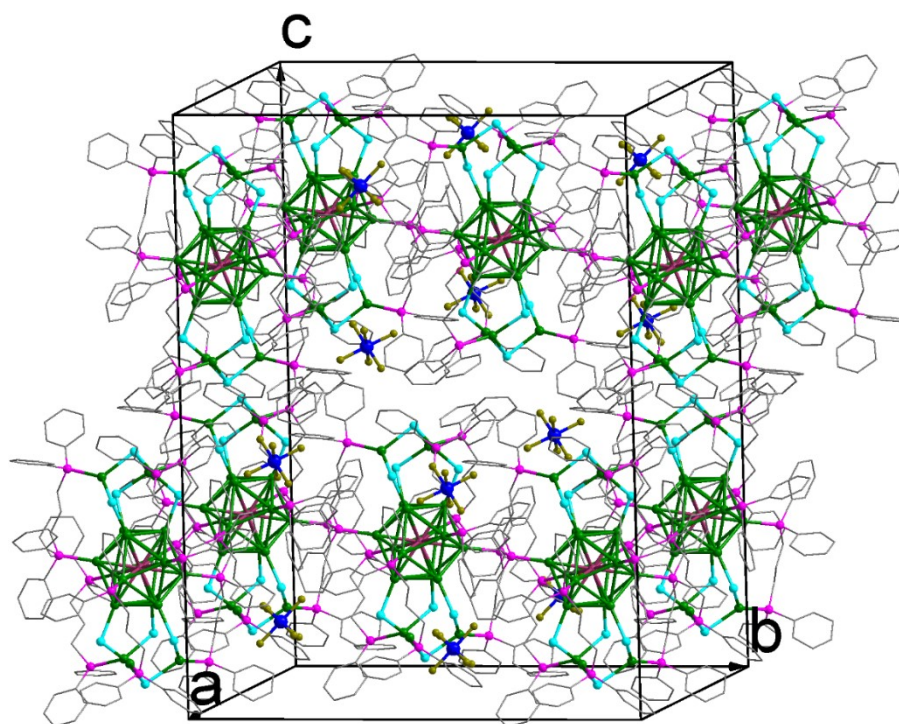

**Figure S4.** The packing structure of PtAg<sub>18</sub> clusters in their single crystals. Color legend: green spheres, Ag; magenta spheres, Pt; pink spheres, P; turquoise spheres, Cl; dark yellow spheres: F; blue spheres: Sb; gray spheres, C. All hydrogen atoms are omitted for clarity.

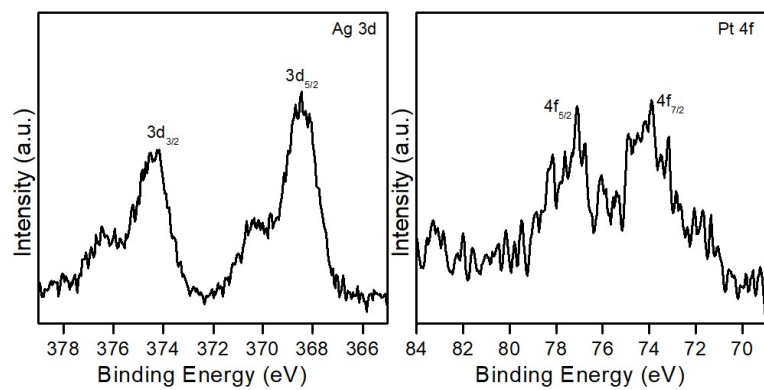

**Figure S5.** XPS spectra of PtAg<sub>18</sub> clusters (left: Ag; right: Pt).

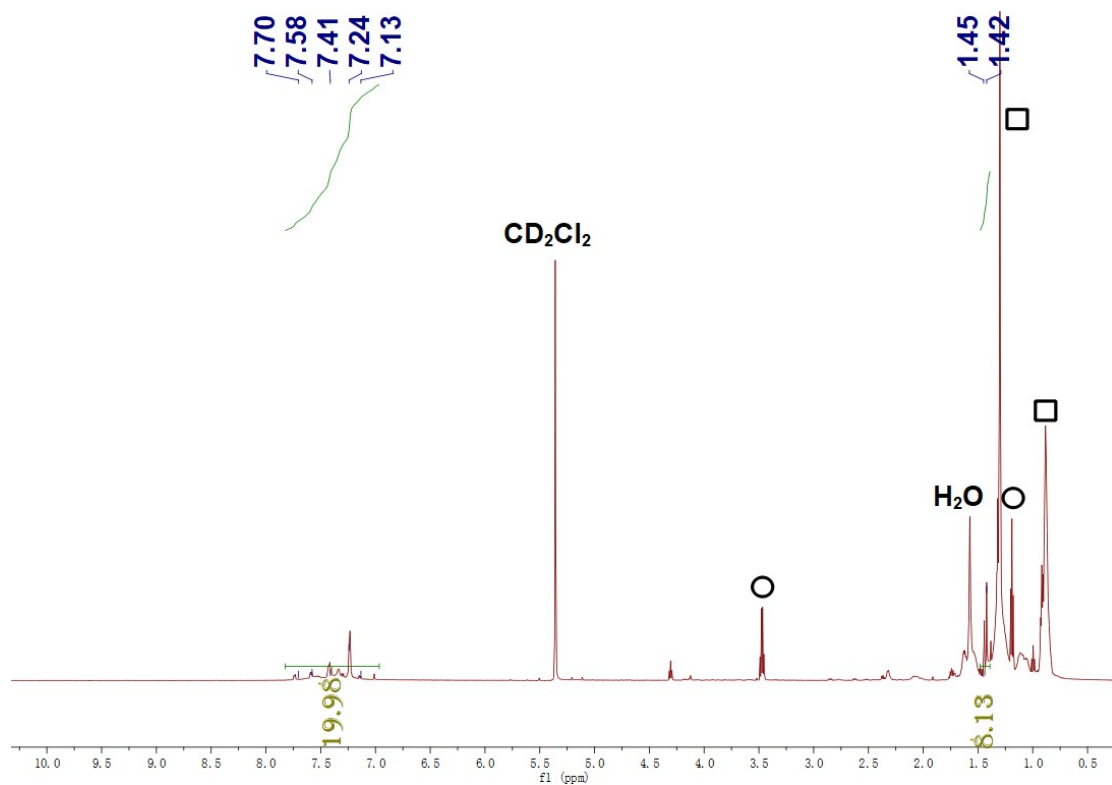

**Figure S6.** <sup>1</sup>H NMR spectrum of PtAg<sub>18</sub> clusters (CD<sub>2</sub>Cl<sub>2</sub>). □ hexane; ○ ether.

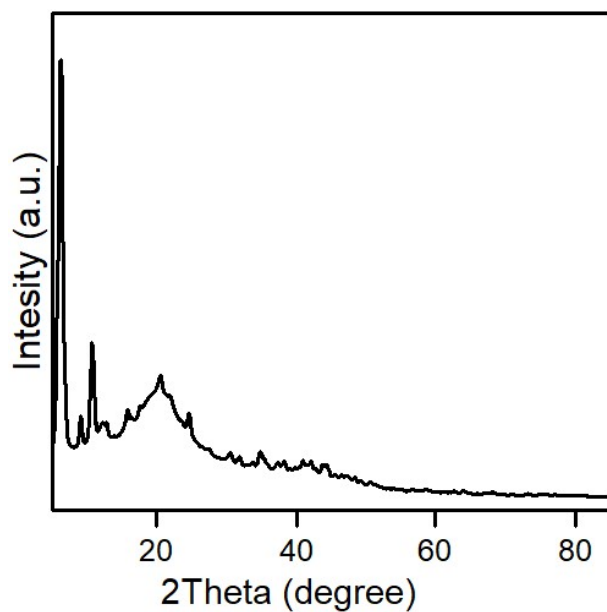

**Figure S7.** Powder X-ray diffraction spectrum of PtAg<sub>18</sub> clusters.

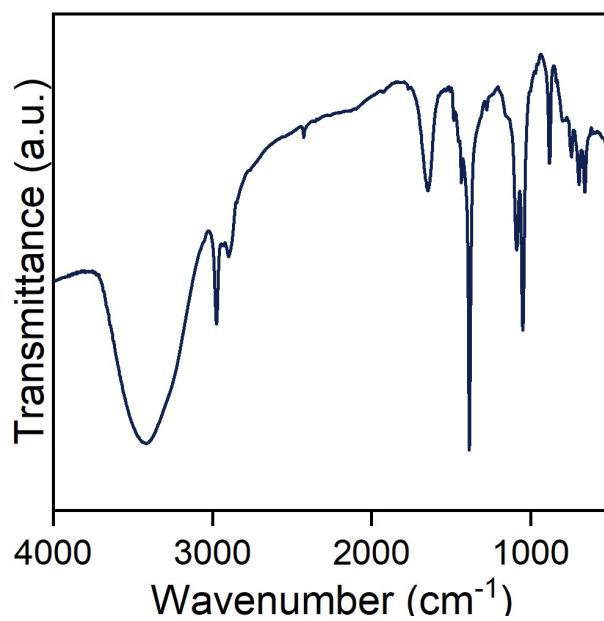

**Figure S8.** Infrared spectrum of PtAg<sub>18</sub> clusters.

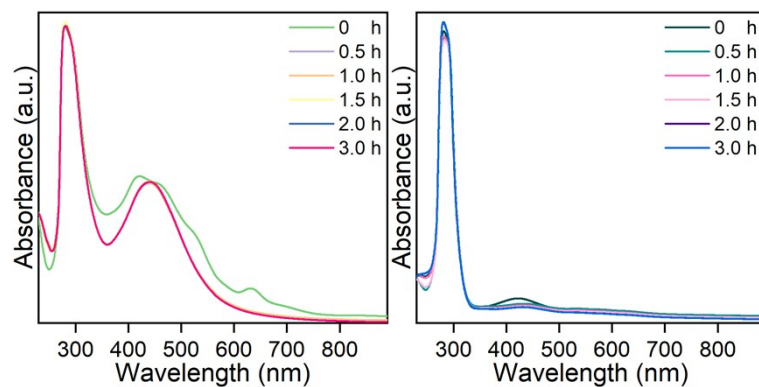

**Figure S9.** Time-dependent UV-vis absorption spectra of  $\text{Ag}_{44}(\text{SR})_{30}$  (left) and  $[\text{Ag}_9\text{Cu}_6(\text{tBuC}\equiv\text{C})_{12}]^+$  (right) at  $50\text{ }^\circ\text{C}$ .

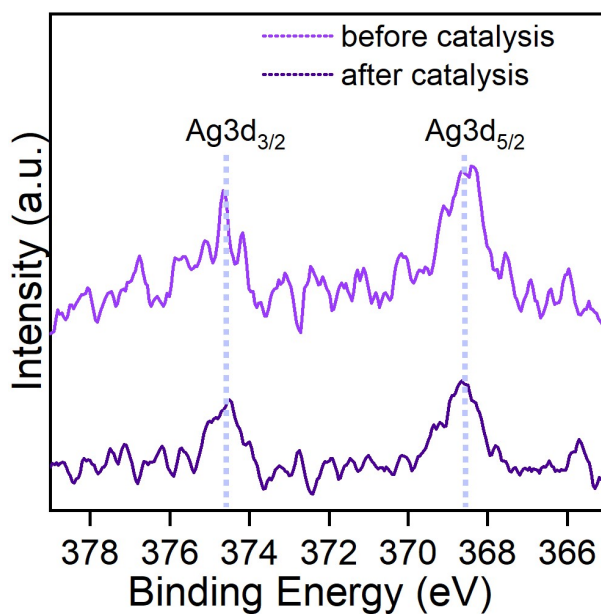

**Figure S10.** Ag XPS spectra of  $\text{PtAg}_{18}/\text{XC-72}$  before and after catalytic hydrogenation reaction.



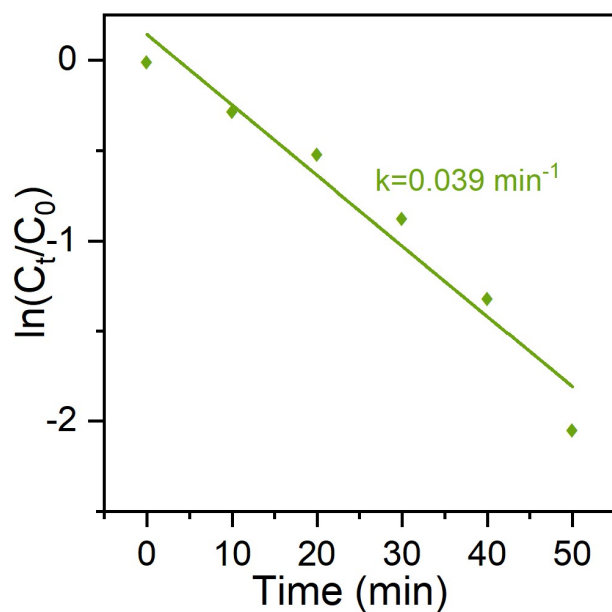

**Figure S11.** Time-dependent  $\ln(C_t/C_0)$  for PtAg<sub>18</sub>/XC-72.

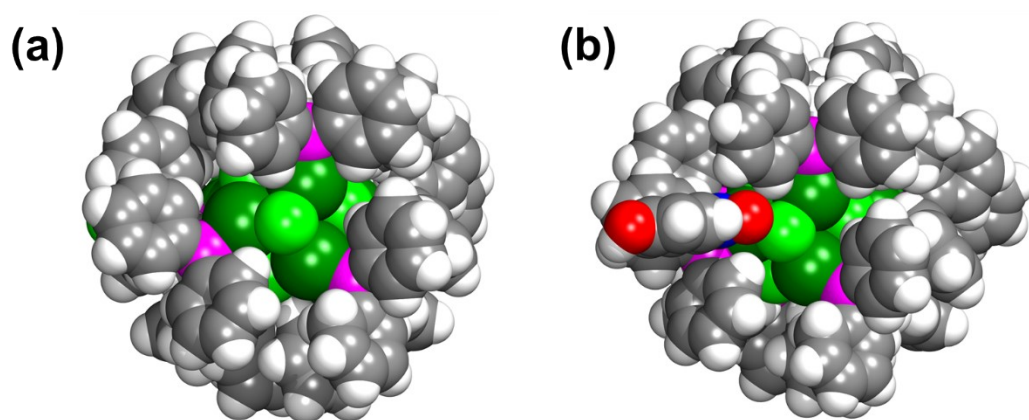

**Figure S12.** (a) Diagram of three of the six exposed silver atoms of PtAg<sub>18</sub>; the other three open silver sites are located on the opposite side. (b) Diagrams of the adsorption of 4-nitrophenol on the surface of PtAg<sub>18</sub>.

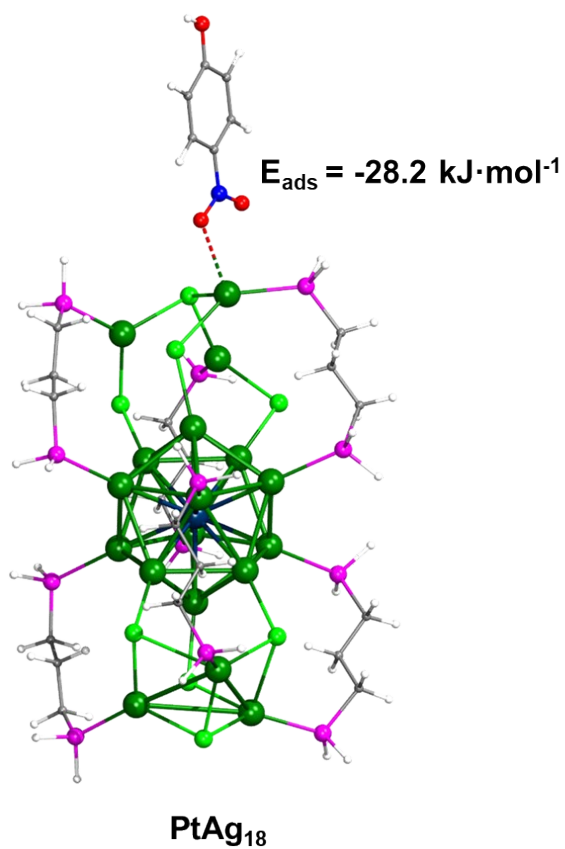

**Figure S13.** Optimized structures of 4-nitrophenol adsorbed on the PtAg<sub>18</sub>.

**Table S1. Crystal data and structure refinement for [PtAg<sub>18</sub>(dppp)<sub>6</sub>Cl<sub>8</sub>](SbF<sub>6</sub>)<sub>2</sub>.**

|                                             |                                                                                                                      |
|---------------------------------------------|----------------------------------------------------------------------------------------------------------------------|
| Identification code                         | [PtAg <sub>18</sub> (dppp) <sub>6</sub> Cl <sub>8</sub> ](SbF <sub>6</sub> ) <sub>2</sub>                            |
| Empirical formula                           | C <sub>162</sub> H <sub>158</sub> Ag <sub>18</sub> Cl <sub>8</sub> F <sub>12</sub> P <sub>12</sub> PtSb <sub>2</sub> |
| Formula weight                              | 5368.36                                                                                                              |
| Temperature/K                               | 100                                                                                                                  |
| Crystal system                              | monoclinic                                                                                                           |
| Space group                                 | C1 2/c1                                                                                                              |
| a/Å                                         | 16.4557(4)                                                                                                           |
| b/Å                                         | 30.7351(6)                                                                                                           |
| c/Å                                         | 37.4768(10)                                                                                                          |
| α/°                                         | 90                                                                                                                   |
| β/°                                         | 97.714(2)                                                                                                            |
| γ/°                                         | 90                                                                                                                   |
| Volume/Å <sup>3</sup>                       | 18783.0(8)                                                                                                           |
| Z                                           | 4                                                                                                                    |
| ρ <sub>calc</sub> /g/cm <sup>3</sup>        | 1.898                                                                                                                |
| μ/mm <sup>-1</sup>                          | 20.723                                                                                                               |
| F(000)                                      | 10320.0                                                                                                              |
| Crystal size/mm <sup>3</sup>                | 0.2 × 0.1 × 0.3                                                                                                      |
| Radiation                                   | CuKα (λ = 1.54184)                                                                                                   |
| 2θ range for data collection/°              | 3.420 to 61.168                                                                                                      |
| Index ranges                                | -15 ≤ h ≤ 18, -34 ≤ k ≤ 34, -42 ≤ l ≤ 42                                                                             |
| Reflections collected                       | 9531                                                                                                                 |
| Independent reflections                     | 14428 [R <sub>int</sub> = 0.1045, R <sub>sigma</sub> = 0.0832]                                                       |
| Data/restraints/parameters                  | 14428/657/933                                                                                                        |
| Goodness-of-fit on F <sup>2</sup>           | 1.019                                                                                                                |
| Final R indexes [I ≥ 2σ (I)]                | R <sub>1</sub> = 0.0826, wR <sub>2</sub> = 0.2206                                                                    |
| Final R indexes [all data]                  | R <sub>1</sub> = 0.1239, wR <sub>2</sub> = 0.2627                                                                    |
| Largest diff. peak/hole / e Å <sup>-3</sup> | 5.50/-1.63                                                                                                           |

**Table S2. Selected bond lengths in PtAg<sub>18</sub>.**

| Bond                                   | Bond length (Å) | Bond                   | Bond length (Å) |
|----------------------------------------|-----------------|------------------------|-----------------|
| Pt-Ag                                  | 2.738           | Ag <sub>core</sub> -Cl | 2.44            |
| Ag <sub>core</sub> -Ag <sub>core</sub> | 2.879           | Cl-Ag <sub>shell</sub> | 2.638           |
| Ag <sub>core</sub> -P                  | 2.37            | Ag <sub>shell</sub> -P | 2.3735          |

**Table S3. Selected bond lengths (Å) for cluster PtAg<sub>18</sub>.**

| Parameter | value      | Parameter | value      |
|-----------|------------|-----------|------------|
| Pt00-Ag1  | 2.7236(10) | Pt00-Ag2  | 2.7248(13) |
| Pt00-Ag3  | 2.7182(13) | Pt00-Ag4  | 2.7512(13) |
| Pt00-Ag5  | 2.7543(14) | Pt00-Ag6  | 2.7565(14) |
| Ag1-Ag2   | 2.8783(14) | Ag1-Ag3   | 2.8329(14) |
| Ag1-Ag4   | 2.8709(17) | Ag1-Ag5   | 2.8572(17) |
| Ag1-Ag6   | 2.9688(17) | Ag1-P00D  | 2.373(5)   |
| Ag2-Ag1   | 2.8783(14) | Ag2-Ag2   | 2.835(2)   |
| Ag2-Ag4   | 2.8494(16) | Ag2-Ag5   | 2.9185(17) |
| Ag2-Ag5   | 2.9102(17) | Ag2-P00F  | 2.369(5)   |
| Ag3-Ag1   | 2.8329(14) | Ag3-Ag3   | 2.874(2)   |
| Ag3-Ag4   | 2.9261(16) | Ag3-Ag6   | 2.8657(17) |
| Ag3-Ag6   | 2.8886(17) | Ag3-P00G  | 2.369(5)   |
| Ag4-Ag1   | 2.8709(17) | Ag4-Ag5   | 2.8724(18) |
| Ag4-Ag6   | 2.8406(18) | Ag4-Cl3   | 2.425(5)   |
| Ag5-Ag2   | 2.9185(17) | Ag5-Ag6   | 2.8567(18) |
| Ag5-Cl00  | 2.449(5)   | Ag6-Ag3   | 2.8887(17) |
| Ag6-Cl1   | 2.446(5)   | Ag7-Cl00  | 2.527(5)   |
| Ag7-Cl2   | 2.592(5)   | Ag7-P00I  | 2.370(5)   |
| Ag8-Cl1   | 2.570(6)   | Ag8-Cl2   | 2.580(6)   |
| Ag0B-Cl2  | 2.545(5)   | Ag8-P00L  | 2.393(6)   |
| Ag0B-P00K | 2.354(6)   | Ag0B- Cl3 | 2.532(6)   |

## References:

1. CrysAlis<sup>Pro</sup> Version 1.171.35.19. (2011). *Agilent Technologies Inc. Santa Clara, CA, USA.*
2. Sheldrick, G. M. *Acta Cryst. A* **2015**, *71*, 3.
3. Sheldrick, G. M. *Acta Cryst. A* **2008**, *64*, 112.
4. Dolomanov, O. V.; Bourhis, L. J.; Gildea, R. J.; Howard, J. A. K.; Puschmann, H. *J. Appl. Cryst.* **2009**, *42*, 339.
5. Huebschle, C. B.; Sheldrick, G. M.; Dittrich, B. *J. Appl. Cryst.* **2011**, *44*, 1281.
